# Supplementary material for: CSAP localizes to polyglutamylated microtubules and promotes proper cilia function and zebrafish development
Source: PubMed Central journal article supplement — Mol Biol Cell. 2012 Jun 1;23(11):2122–30. doi: 10.1091/mbc.E11-11-0931 (PMC3364176; doi:10.1091/mbc.e11-11-0931), 2012-06-01
Supplement: supp_E11-11-0931v1_CombinedSupMats.pdf [file supp_E11-11-0931v1_CombinedSupMats.pdf]

## Supplemental Figures

### Supplemental Figure 1

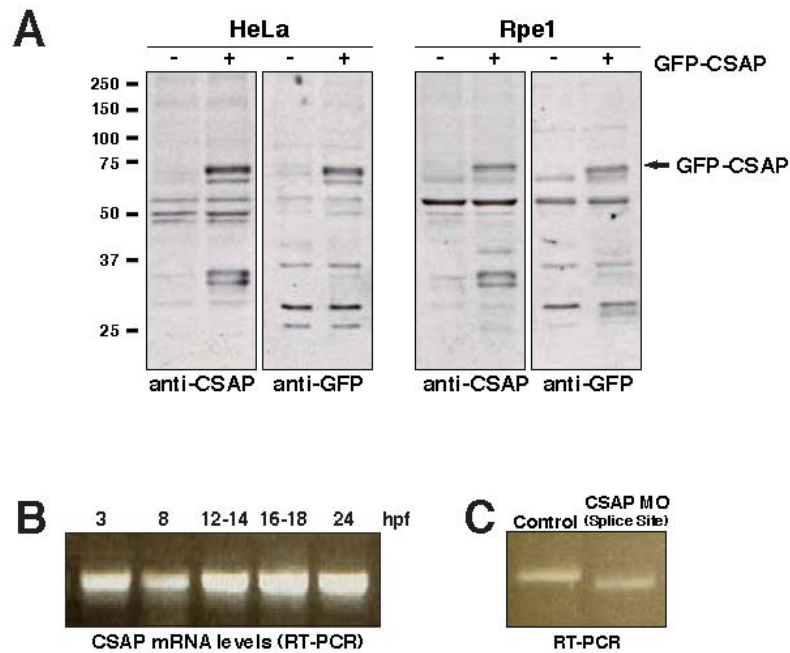

**Supplemental Figure 1. Analysis of CSAP antibody and morpholino specificity.** (A) Western Blot indicating CSAP antibody specificity. HeLa and hTERT-RPE1 cells +/- GFP-CSAP expression were harvested and blotted with anti-CSAP antibodies. Arrow indicated a CSAP specific band from both types of cells stably expressing GFP-CSAP. (B) RT-PCR from wild type embryos assessing RNA levels from 3 to 24 hpf embryos. CSAP is expressed maternally and zygotically. (C) RT-PCR from Control MO with p53 MO and CSAP MO with p53 MO injected embryos. mRNA levels indicate a decreased amplicon size due to an incorrect splicing event.
